# Supplementary material
Source: PubMed Central journal article supplement (PMC2861036)
Supplement: NIHMS190170-supplement-supp_data.pdf [file NIHMS190170-supplement-supp_data.pdf]

**SUPPORTING INFORMATION**

**Re-engineering Aptamers to Support Reagentless,  
Self-Reporting Electrochemical Sensors**

Ryan J. White<sup>1</sup>, Aaron A. Rowe<sup>1</sup> and Kevin W. Plaxco<sup>1,2</sup>

<sup>1</sup>Department of Chemistry and Biochemistry

<sup>2</sup>Biomolecular Science and Engineering Program

University of California, Santa Barbara

Santa Barbara, CA 93106

\*Author to whom correspondence should be addressed

E-mail: [kwp@chem.ucsb.edu](mailto:kwp@chem.ucsb.edu)

Fax: (805) 893-4120

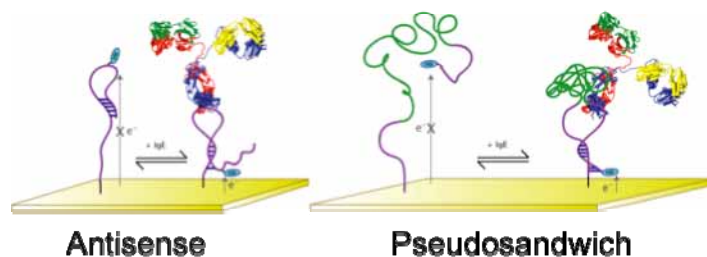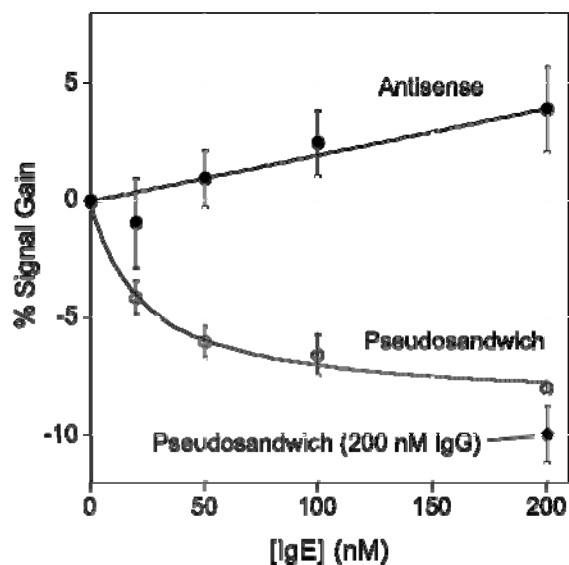

**Figure S11.** The addition of both anti-sense and unstructured sequences internal to the IgE full-length sequence does not produce IgE signaling E-AB sensors. For example, The introduction of an antisense sequence (16 nucleotides, 12 base pairs (antisense) does not produce specific, appreciable signal in the presence of IgE. Similarly, a poly-thymine<sub>60</sub> insertion (pseudosandwich) does not produce specific IgE signal as shown.
